# Supplementary material for: Phytohormones Producing Acinetobacter bouvetii P1 Mitigates Chromate Stress in Sunflower by Provoking Host Antioxidant Response
Source: MDPI journal article supplement (doi:10.3390/antiox10121868), 2021-11-24
Supplement: s1 [file s1]

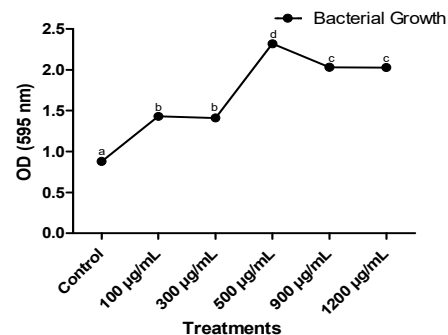

**Figure S1.** Effects of different chromium levels on the bacterial growth. Data represent mean with SE $\pm$  and letter represent significance ( $p < 0.05$ ).

**Table S1.** Effect of Cr<sup>+6</sup> and P1 on indole acetic acid contents, total flavonoids, total phenolics and Proline contents in plant biomass (PB) and their exudation by root (E/g of Roots). Different alphabets represent significance ( $p < 0.05$ ).

| Treatment                      | Indole Acetic Acid ( $\mu\text{g/g}$ ) |                               | Total Flavonoids ( $\mu\text{g/g}$ ) |                               | Total Phenolic ( $\mu\text{g/g}$ ) |                               | Proline contents (mg/g)       |                                |
|--------------------------------|----------------------------------------|-------------------------------|--------------------------------------|-------------------------------|------------------------------------|-------------------------------|-------------------------------|--------------------------------|
|                                | PB                                     | E/g of Roots                  | PB                                   | E/g of Roots                  | PB                                 | E/g of Roots                  | PB                            | E/g of Roots                   |
| Control                        | 69.28 <sup>d</sup> $\pm$ 1.17          | 12.84 <sup>e</sup> $\pm$ 0.64 | 10.91 <sup>d</sup> $\pm$ 0.31        | 3.76 <sup>a</sup> $\pm$ 1.17  | 526.6 <sup>d</sup> $\pm$ 1.17      | 41.33 <sup>d</sup> $\pm$ 0.1  | 0.75 <sup>a</sup> $\pm$ 0.007 | 0.52 <sup>a</sup> $\pm$ 0.001  |
| 25 $\mu\text{g mL}^{-1}$       | 46.30 <sup>c</sup> $\pm$ 0.28          | 11.08 <sup>c</sup> $\pm$ 0.87 | 11.95 <sup>e</sup> $\pm$ 0.54        | 5.98 <sup>b</sup> $\pm$ 0.84  | 510.4 <sup>c</sup> $\pm$ 2.28      | 5.12 <sup>c</sup> $\pm$ 0.84  | 0.84 <sup>b</sup> $\pm$ 0.002 | 0.56 <sup>b</sup> $\pm$ 0.008  |
| 50 $\mu\text{g mL}^{-1}$       | 10.82 <sup>a</sup> $\pm$ 1.56          | 9.80 <sup>b</sup> $\pm$ 0.56  | 13.72 <sup>g</sup> $\pm$ 1.06        | 8.00 <sup>d</sup> $\pm$ 0.21  | 457.9 <sup>b</sup> $\pm$ 1.56      | 0.41 <sup>a</sup> $\pm$ 0.32  | 1.02 <sup>c</sup> $\pm$ 0.01  | 0.74 <sup>e</sup> $\pm$ 0.003  |
| 100 $\mu\text{g mL}^{-1}$      | 12.34 <sup>b</sup> $\pm$ 0.89          | 9.21 <sup>a</sup> $\pm$ 1.38  | 14.33 <sup>h</sup> $\pm$ 1.06        | 7.94 <sup>c</sup> $\pm$ 1.06  | 409.2 <sup>a</sup> $\pm$ 1.89      | 3.05 <sup>b</sup> $\pm$ 0.11  | 1.67 <sup>d</sup> $\pm$ 0.01  | 1.17 <sup>f</sup> $\pm$ 0.001  |
| P1                             | 82.19 <sup>h</sup> $\pm$ 0.71          | 12.13 <sup>d</sup> $\pm$ 1.84 | 8.31 <sup>a</sup> $\pm$ 0.54         | 23.00 <sup>e</sup> $\pm$ 0.76 | 593.7 <sup>e</sup> $\pm$ 2.71      | 60.76 <sup>h</sup> $\pm$ 0.76 | 2.25 <sup>h</sup> $\pm$ 0.007 | 0.69 <sup>c</sup> $\pm$ 0.01   |
| P1(25 $\mu\text{g mL}^{-1}$ )  | 80.84 <sup>g</sup> $\pm$ 1.71          | 18.56 <sup>f</sup> $\pm$ 1.23 | 8.86 <sup>b</sup> $\pm$ 1.11         | 24.57 <sup>f</sup> $\pm$ 0.76 | 623.9 <sup>f</sup> $\pm$ 2.71      | 43.84 <sup>e</sup> $\pm$ 0.86 | 1.71 <sup>e</sup> $\pm$ 0.007 | 0.732 <sup>e</sup> $\pm$ 0.002 |
| P1(50 $\mu\text{g mL}^{-1}$ )  | 73.67 <sup>e</sup> $\pm$ 1.84          | 21.91 <sup>g</sup> $\pm$ 0.28 | 9.45 <sup>c</sup> $\pm$ 1.06         | 25.56 <sup>g</sup> $\pm$ 1.11 | 680.7 <sup>g</sup> $\pm$ 3.84      | 47.17 <sup>g</sup> $\pm$ 1.11 | 2.04 <sup>f</sup> $\pm$ 0.008 | 0.72 <sup>d</sup> $\pm$ 0.001  |
| P1(100 $\mu\text{g mL}^{-1}$ ) | 76.21 <sup>f</sup> $\pm$ 1.23          | 23.08 <sup>h</sup> $\pm$ 1.56 | 13.11 <sup>f</sup> $\pm$ 0.54        | 26.52 <sup>h</sup> $\pm$ 0.61 | 753.1 <sup>h</sup> $\pm$ 2.23      | 45.89 <sup>f</sup> $\pm$ 0.61 | 2.08 <sup>g</sup> $\pm$ 0.003 | 0.74 <sup>d</sup> $\pm$ 0.002  |
